# Supplementary material
Source: PubMed Central journal article supplement (PMC6906775)
Supplement: ao9b02152_si_001.pdf [file ao9b02152_si_001.pdf]

# Supporting Information

## Cauliflower-like nickel with polar Ni(OH)<sub>2</sub>/NiO<sub>x</sub>F<sub>y</sub> shell to decorate copper meshes for efficient oil/water separation

Zhi-Yong Luo<sup>a, b, c</sup>, Shu-Shen Lyu<sup>a, c</sup>, and Dong-Chuan Mo<sup>a, c, \*</sup>

<sup>a</sup> School of Materials, Sun Yat-sen University, Guangzhou 510275, P. R. China

<sup>b</sup> School of Materials Science and Engineering, Nanyang Technological University, 50 Nanyang Avenue, Singapore 639798, Singapore

<sup>c</sup> Guangdong Engineering Technology Research Centre for Advanced Thermal Control Material and System Integration (ATCMSI), Guangzhou 510275, China.

\*Corresponding Author: Dong-Chuan Mo, E-mail: [modongch@mail.sysu.edu.cn](mailto:modongch@mail.sysu.edu.cn), Tel: +86-20-84113985.

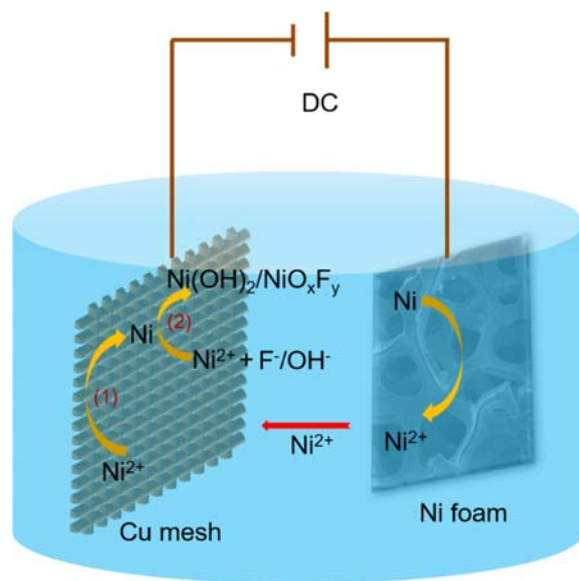

**Figure S1** Schematic illustration of the preparation of Cu mesh@CF-Ni via electrodeposition

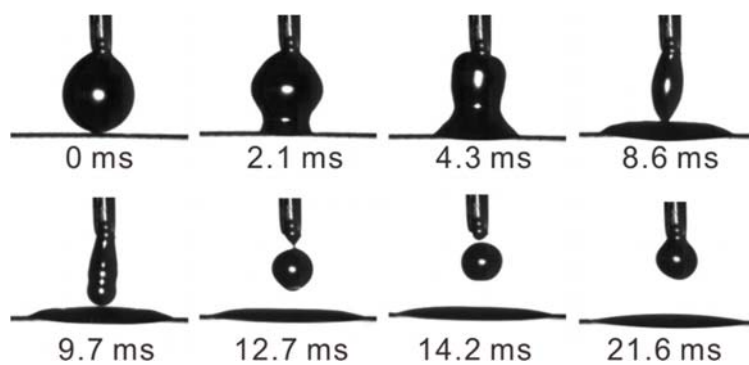

**Figure S2** Water droplet spread out on the superhydrophilic Cu mesh@CF-Ni

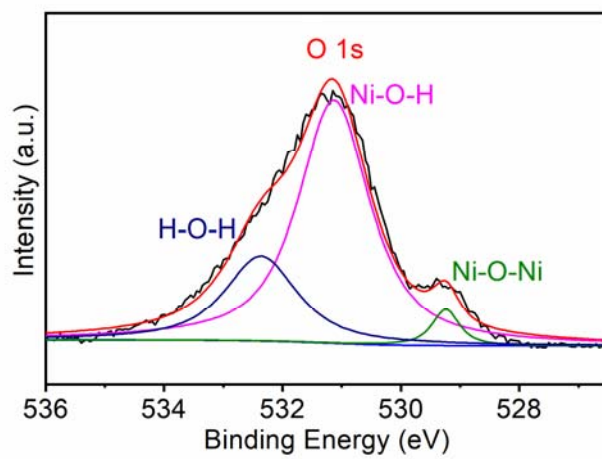

**Figure S3** O 1s spectra of Cu mesh@CF-Ni

**Table S1** Electrochemical corrosion measurements of Cu mesh@CF-Ni in solutions.

| <b>Solution</b>  | <b>Corrosion current density<br/>(<math>\mu\text{A cm}^{-2}</math>)</b> |
|------------------|-------------------------------------------------------------------------|
| H <sub>2</sub> O | 1.6                                                                     |
| 10 wt% NaCl      | 25.1                                                                    |
| 1 M NaOH         | 31.6                                                                    |
| 1 M HCl          | 501.2                                                                   |

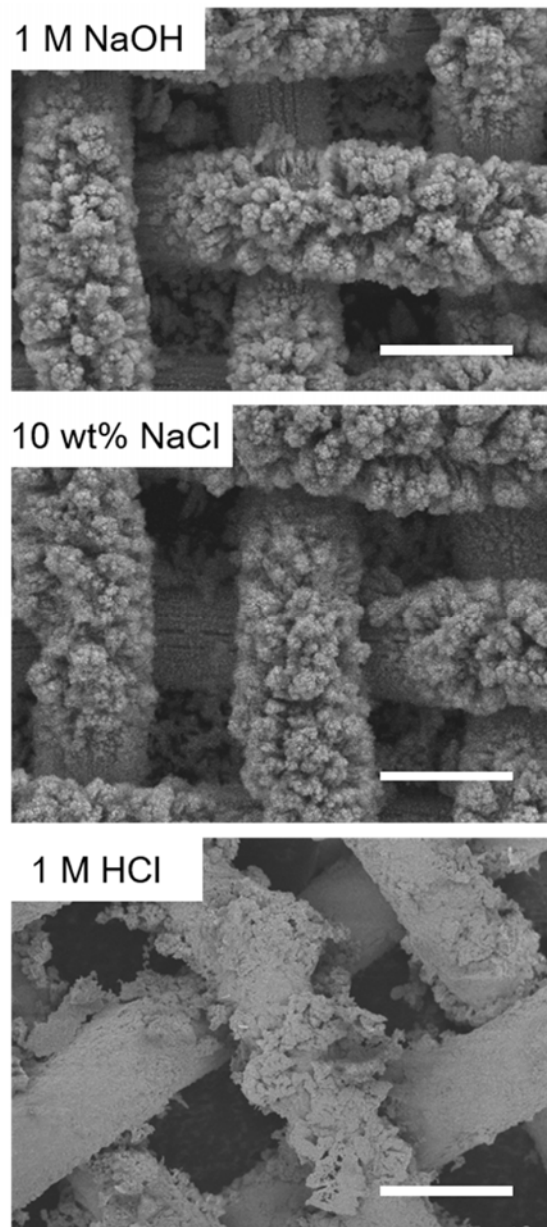

**Figure S4** SEM images of Cu mesh@CF-Ni immersed in solutions for 1 h. The bar is 50 μm

**Movie S1** The visual oil/water separation experiment
